# Supplementary material
Source: PubMed Central journal article supplement (PMC4274952)
Supplement: NIHMS632492-supplement-Supplement1.pdf [file NIHMS632492-supplement-Supplement1.pdf]

## Supplementary Appendix

This appendix has been provided by the authors to give readers additional information about their work.

Supplement to: Jamuar SS, Lam A-TN, Kircher M, et al. Somatic mutations in cerebral cortical malformations. N Engl J Med 2014;371:733-43. DOI: 10.1056/NEJMoa1314432

## **SUPPLEMENTARY APPENDIX**

### **Deep sequence analysis of the role of somatic mutations in cerebral cortical malformations**

#### **Table of contents**

Page 3-5: List of investigators in the Brain Malformation Study Group

Page 6-7: Supplementary text: Methods

Page 8-9: Supplementary text: Results

Page 10: Figure S1: Schematic workflow of our targeted deep sequencing

Page 11: Figure S2: Estimated  $p$  value for differing AARF at different depths of coverage

Page 12: Figure S3: Calibration sample

Page 13: Figure S4: Sanger chromatogram of PH-16001

Page 14: Figure S5: A comparison of synonymous and rare protein-altering mutations across the three phenotypes

Page 15: Figure S6: Spectrum of severity of doublecortex in mosaic individuals

Page 16: Figure S7: Axial and midline sagittal MRI brain of individual LIS-6801

Page 17: Figure S8: Sanger chromatogram of family BFP-801

Page 18: Figure S9: Axial and midline sagittal MRI brain of individual PAC-1701

Page 19: Figure S10: Axial and midline sagittal MRI brain of individual DC-7801

Page 20: Table S1: List of known genes in the two panels

Page 21: Table S2: Control samples

Page 22-23: Table S3: Clinical phenotype of mutation positive patients

Page 24-25: Table S4: MRI reports of mutation positive patients

Page 26-27: Table S5: Details of germline mutations (pathogenic and variants of uncertain significance)

Page 28: Table S6: Protein altering variants predicted to be non-pathogenic by *in silico* prediction algorithms

Page 29-30: Table S7: Inherited variants- detected in unaffected parent and/or unaffected sibling

Page 31-33: Table S8:  $p$  value for the AARF for each sample

Page 34-35: Table S9: Comparison of proportion of reads with mosaic variant detected on NGS and subcloning for validated and not validated variants

Page 36: Table S10: Details of the mosaic mutations detected by our panel

Page 37-38: Table S11: Further details of the reported mutations

Page 39: Table S12: Summary of MRI findings of individuals with *de novo* variants in *DYNC1H1*  
Page 40-42: Supplementary references

## **Brain Malformation Study Group**

- Christopher A. Walsh\*, PI
- Annapurna Poduri\*
- Mustafa Sahin\*
- Bernard S. Chang\*
- Timothy W. Yu\*
- Saumya S. Jamuar\*
- Meral Topcu\*
- Dina Amrom\*
- Eva Andermann\*
- Renzo Guerrini\*
- Ingrid E. Scheffer\*
- Samuel F. Berkovic\*
- Richard J. Leventer\*
- A James Barkovich\*
- Bernard Dan\*
- Elena Parrini\*
- Ganeshwaran Mochida, Division of Genetics and Genomics, Boston Children's Hospital,  
Boston, MA, USA
- Heather Olson, Division of Neurology, Boston Children's Hospital, Boston, MA, USA
- Joseph G. Gleeson, Dept. of Neurosciences and Pediatrics, University of California, San  
Diego, CA, USA

- William Dobyns, Division of Genetic Medicine, University of Washington, Seattle, WA, USA
- John Mulley, Royal Children's Hospital, The University of Melbourne, Australia
- Michel Berg, Department of Neurology, University of Rochester Medical Center, Rochester, New York, USA
- Z Yapici, Department of Neurology, Division of Child Neurology, Istanbul Faculty of Medicine, Istanbul University, Istanbul, Turkey
- Nehama Kfir, Department of Neurology, Division of Child Neurology, Istanbul Faculty of Medicine, Istanbul University, Istanbul, Turkey
- Sangeeta Dey, 594 Marrett Road, Suite 22, Lexington, MA, USA
- Adre J. DuPlessis, Children's National Medical Center, Center for Neuroscience Research (CNR), Washington, DC, USA
- James Wheless, Department of Pediatric Neurology, The University of Tennessee Health Science Center, Pediatric Neurology, Memphis, TN, USA
- Jean Ricci Goodman, Maternal/Fetal Medicine 2160 S. First Ave., Maywood, IL, USA
- Elizabeth Butler, Michigan State University, Department of Pediatrics and Human Development, East Lansing, MI, USA
- Grace Yoon, Division of Clinical and Metabolic Genetics, The Hospital for Sick Children, Toronto, Canada
- Alva Moncayo, Servicio de Neurología Pediátrica, Hospital General Médico Nacional La Raza, México DF, Mexico
- John N. Gaitanis, Dept of Neurology, Hasbro Children's Hospital, Providence, RI, USA
- Tzipora Falik Zaccai, Institute of Human Genetics, Bar-Ilan University, Israel

- Kazuhiro Kamuro, Department of Pediatrics, Kokubu Seikyo Hospital, Kogoshima, Japan

**\*for affiliations of these authors, please refer to the title page**

**The study was initiated in May 2012 and completed in Nov 2013.**

## Supplementary text

### Methods

**Gene selection:** Candidate genes were selected based on findings from whole exome studies and RNA-Seq analysis of the developing mouse and human cerebral cortex<sup>1</sup>, with emphasis on genes encoding microtubule subunits and dynein/kinesin motors that are highly expressed during human cerebral cortex development.

**Controls:** Five samples from patients (Table S2) with known mutations were included in our analyses as positive controls. In addition, to determine the sensitivity of our variant calling for low-level somatic mosaicism, we generated a series of mosaic control samples by diluting DNA from two individuals known to carry heterozygous mutations in either *DCX* or *FLNA* with DNA from an individual without *DCX* and *FLNA* mutations to generate mutant allele frequencies of 50%, 10%, 1% and 0.1%.

**Targeted sequencing:** Library preparation was performed as per manufacturer's protocol. Pooled oligonucleotides were used to capture target exons from 250 ng of leukocyte-derived DNA from each proband. PCR was performed using universal primers, with the introduction of unique 8-base barcodes on both ends. Pooled libraries were subjected to massively parallel sequencing using a 251-bp paired-end protocol on the MiSeq platform.

**Data analysis, variant calling, and Sanger validation:** Raw read data processing and mapping were performed using BWA-SW<sup>2</sup>. Single nucleotide variant (SNV) and insertion and/or deletion (indel) calling and filtering were performed using GATK<sup>3</sup>. Variants were quality filtered to exclude false positives according to standard thresholds (QUAL<30, QD<5, coverage<10x and clustered variants (window size of 10). Variant annotations were applied with MiSeq Reporter version 2.1.43 using the Somatic Variant Caller<sup>4</sup>. Data from the Exome sequencing project

(ESP)<sup>5</sup>, dbSNP 137<sup>6</sup> and 1000 Genomes Project<sup>7</sup> were used to assess variant frequencies in control population.



## Results

### CONFIRMATION AND IDENTIFICATION OF ADDITIONAL CANDIDATE GENES

Individual LIS-6801 with posterior pachygyria, diminished white matter and abnormal corpus callosum (Figure S7) showed a previously unreported variant in *KIF5C* (A268S) (Table S5), a gene that was recently identified in a family which included 4 affected boys with severe malformations of cortical development and microcephaly<sup>10</sup>. *KIF5C* encodes a member of the kinesin superfamily involved in intracellular transport along microtubules<sup>10</sup>. Though we were unable to perform segregation as parental DNA was unavailable, this variant alters a highly conserved residue in the kinesin motor domain, and was predicted to be pathogenic and was absent from the control population. Therefore, this likely mutation further supports a role of *KIF5C* in cerebral cortical malformations.

We found variants in three candidate genes for neuronal migration disorders that bear further study— *KIF7* (G94D), *KIF1A* (R18W) and *KIF26A* (Q455R) in individuals BFP-801, PAC-1701 and DC-7801, respectively (Table S5). As parental DNA was unavailable for PAC-1701 and DC-7801, we were unable to perform segregation analysis. Follow-up segregation analysis by Sanger sequencing revealed that father of BFP-801 had a minor peak consistent with mosaicism (Figure S8), which was confirmed on subcloning (2 out of 16 reads, data not shown). Heterozygous mutation in *KIF7* has been associated with developmental delay<sup>11</sup>. Biallelic mutations in *KIF7* have been associated with acrocallosal syndrome and hydroletharus, while heterozygous mutations in *KIF7* interact with other ciliary genes to exacerbate overall severity in Bardet-Biedl syndrome<sup>12</sup>. Review of published MRIs shows widespread gyral abnormalities with *KIF7* mutations<sup>12</sup>. Her MRI showed bilateral frontal, temporal, and parietal pachygyria. The *KIF1A* mutation in individual PAC-1701 affects a highly conserved amino acid in the kinesin

motor domain. Doublecortin (encoded by *DCX* and associated with neuronal migration disorders) is essential for KIF1A function<sup>13</sup>, and a mutation in the kinesin motor domain may affect the doublecortin-KIF1A interaction resulting in a similar phenotype. Indeed, MRI (Figure S9) of this individual showed frontal pachygyria, as well as a thick corpus callosum and moderately reduced white matter volume. Missense mutation in *KIF1A* has also been reported in an individual with intellectual disability and mild cerebellar vermian atrophy<sup>14</sup>. The *KIF26A* mutation in individual DC-7801 affects a highly conserved nucleotide in the kinesin motor domain. His MRI (Figure S10) showed subcortical band heterotopia. Human mutations in *KIF26A* have not been reported previously. *KIF26A* encodes a kinesin protein that is involved in the microtubule network and has been implicated in enteric neuronal development<sup>15</sup>.

**Figure S1: Schematic workflow of our targeted deep sequencing**

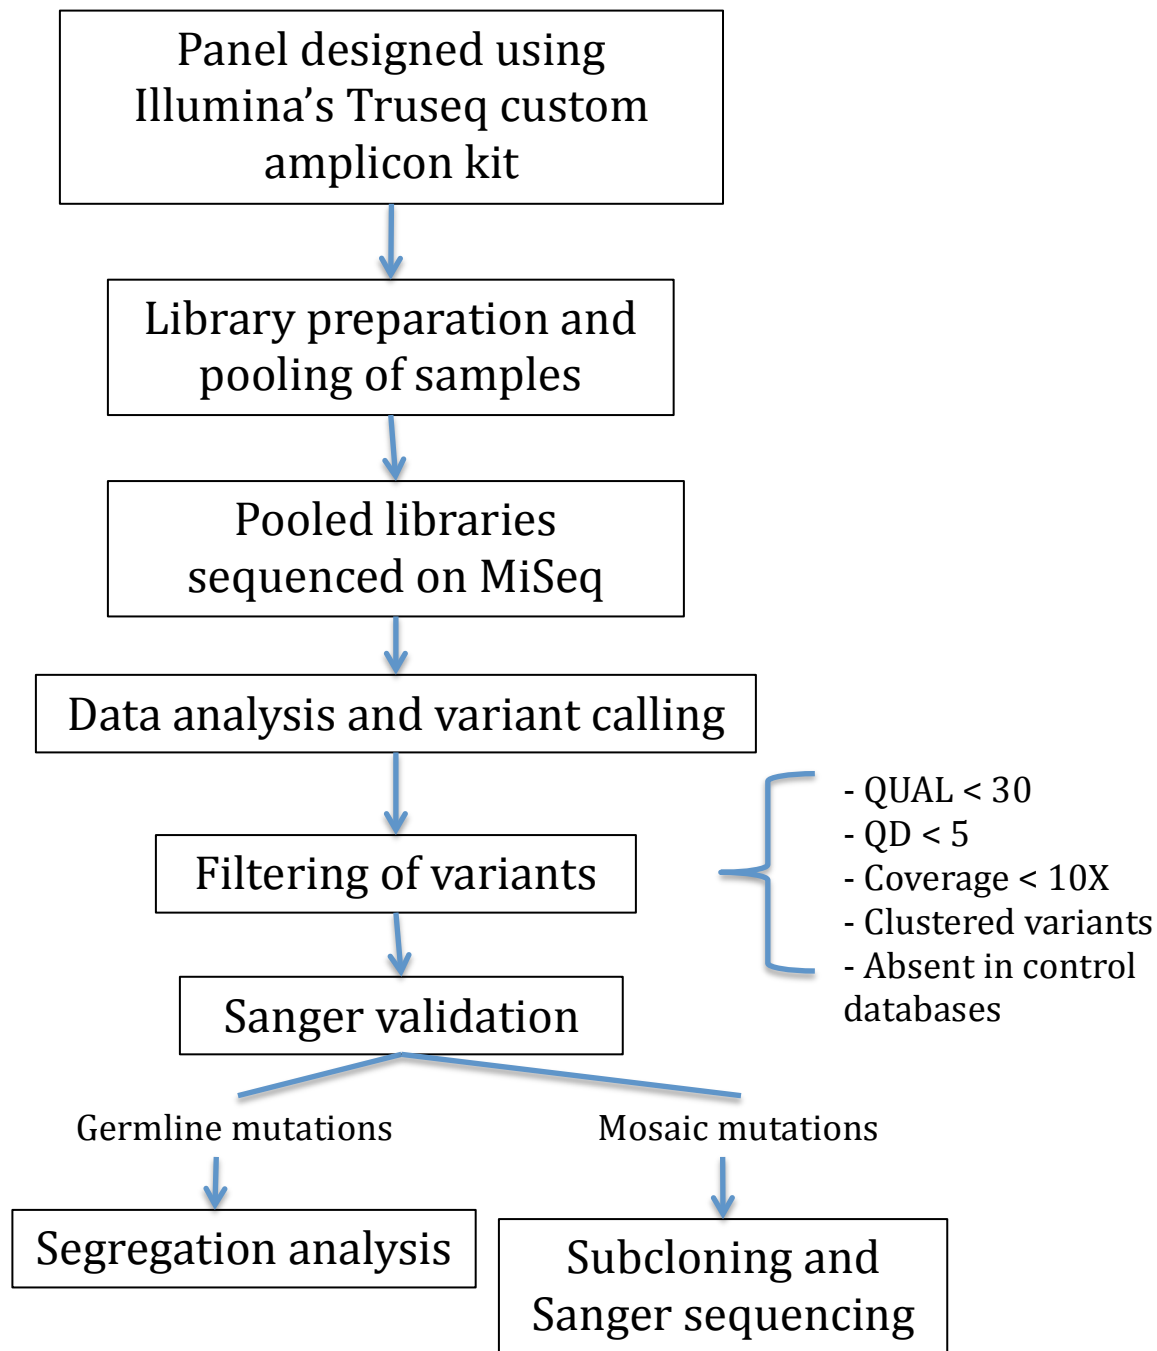

**Figure S2: Estimated  $p$  value for differing AARF at different depths of coverage.**

As the read depth increases, the probability of correctly calling a mosaic variant increases. The read depth required is dependent on the AARF. For e.g. for AARF  $\leq 30\%$ , the required read depth is  $\approx 300x$  and for AARF  $\leq 40\%$ , the required read depth increases exponentially to  $1000x$ . The y-axis represents negative log  $p$  value and hence a higher number corresponds to a smaller  $p$  value. Dashed line denotes the threshold of significant  $p$  value

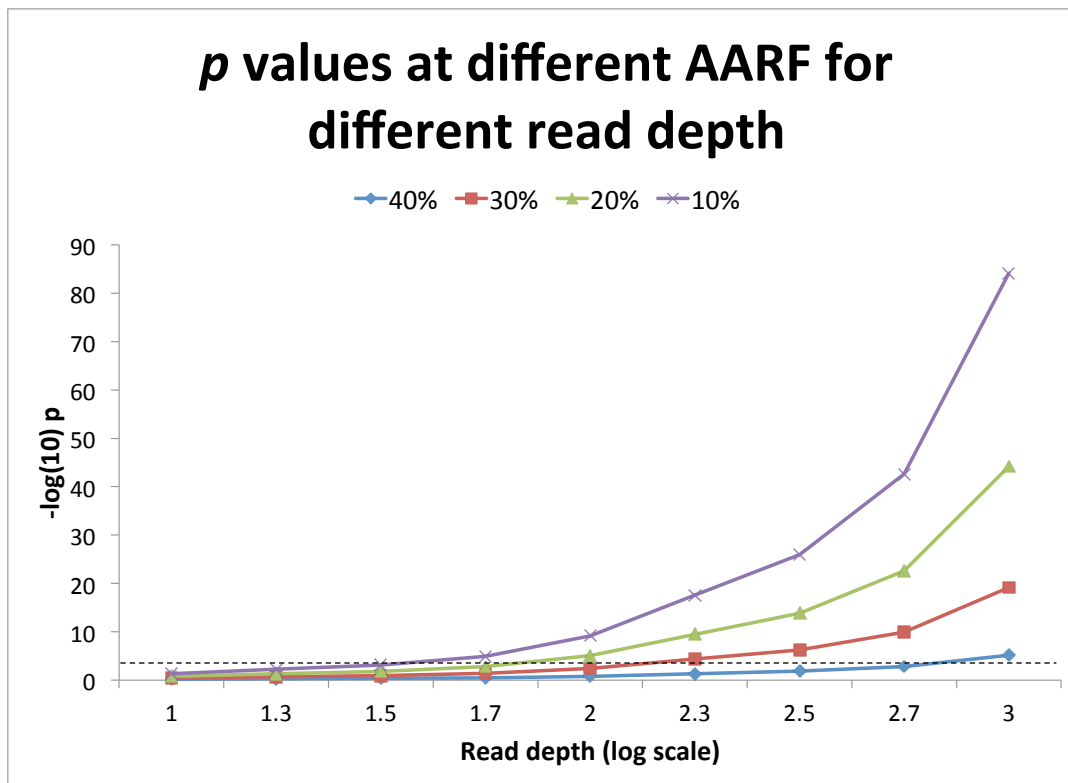

### Figure S3: Calibration sample

Screenshot of Integrative Genomic Viewer shows that deep sequencing on calibration sample with germline DCX mutation (c.115C>T;p.R39X) mixed with wild type allele at varying proportions was detected at a threshold of 1% mosaicism.

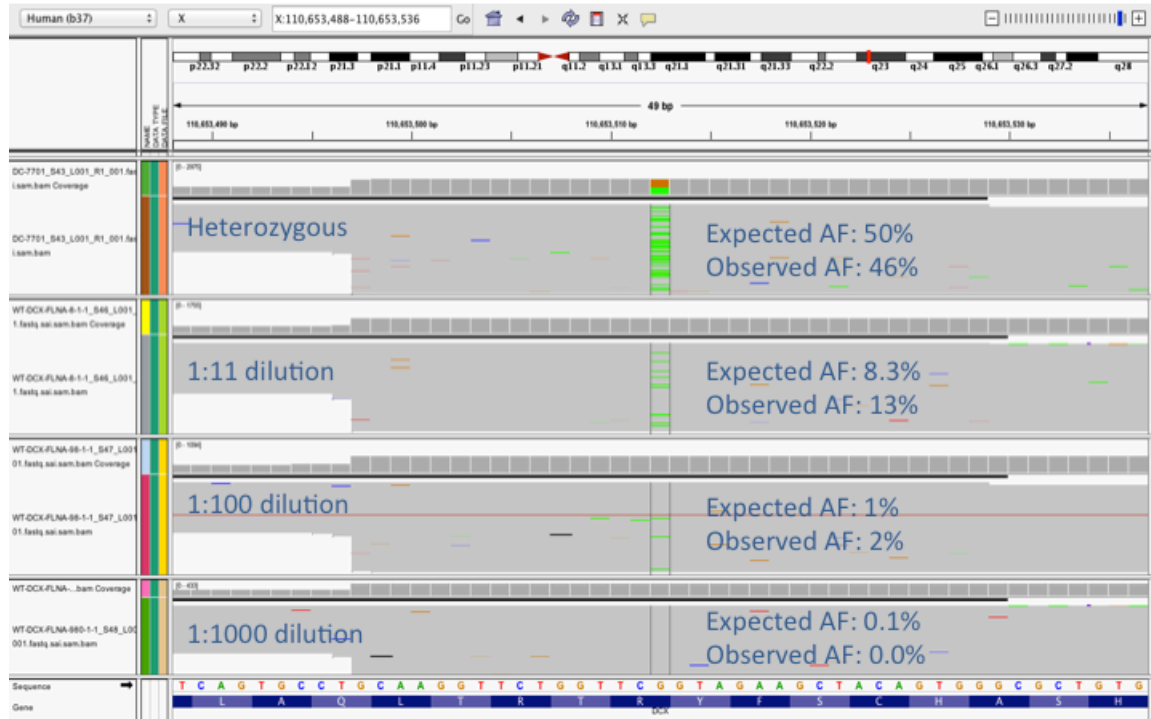

### Figure S4: Sanger chromatogram of PH-16001.

The variant (delG) was reported at an allele fraction of 35% on NGS, but appeared as heterozygous germline variant on Sanger sequencing. However, subcloning confirmed the mutation to be mosaic (reference allele in 118 colonies, mutant allele in 67 colonies, allele fraction 36%,  $p=0.0086$ )

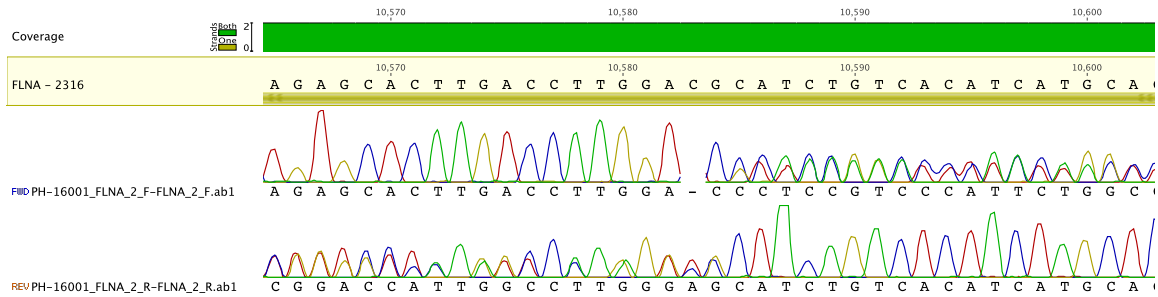

**Figure S5: A comparison of synonymous and rare protein-altering mutations across the three phenotypes.** Synonymous variants in genes associated with a particular phenotype were equally distributed across each phenotype (numbers within each bar represent the average number of variants called per gene group per sample), while rare protein-altering pathogenic variants in the same genes were specifically associated with the phenotype they are known to cause, showing the specificity of pathogenic variants to diagnosis. DC related genes= *DCX*, *LIS1*, *ARX*, *TUBA1A*, *TUBB2B*, *TUBB3*; PVNH related gene= *FLNA*; PMG-M related genes= *AKT3*, *PIK3CA*, *PIK3R2*. \*\*variant in *PIK3R2* is a rare protein altering variant that was predicted to be pathogenic by *in silico* prediction software. However, it was inherited from an unaffected parent and is unlikely to be causative (Table S6).

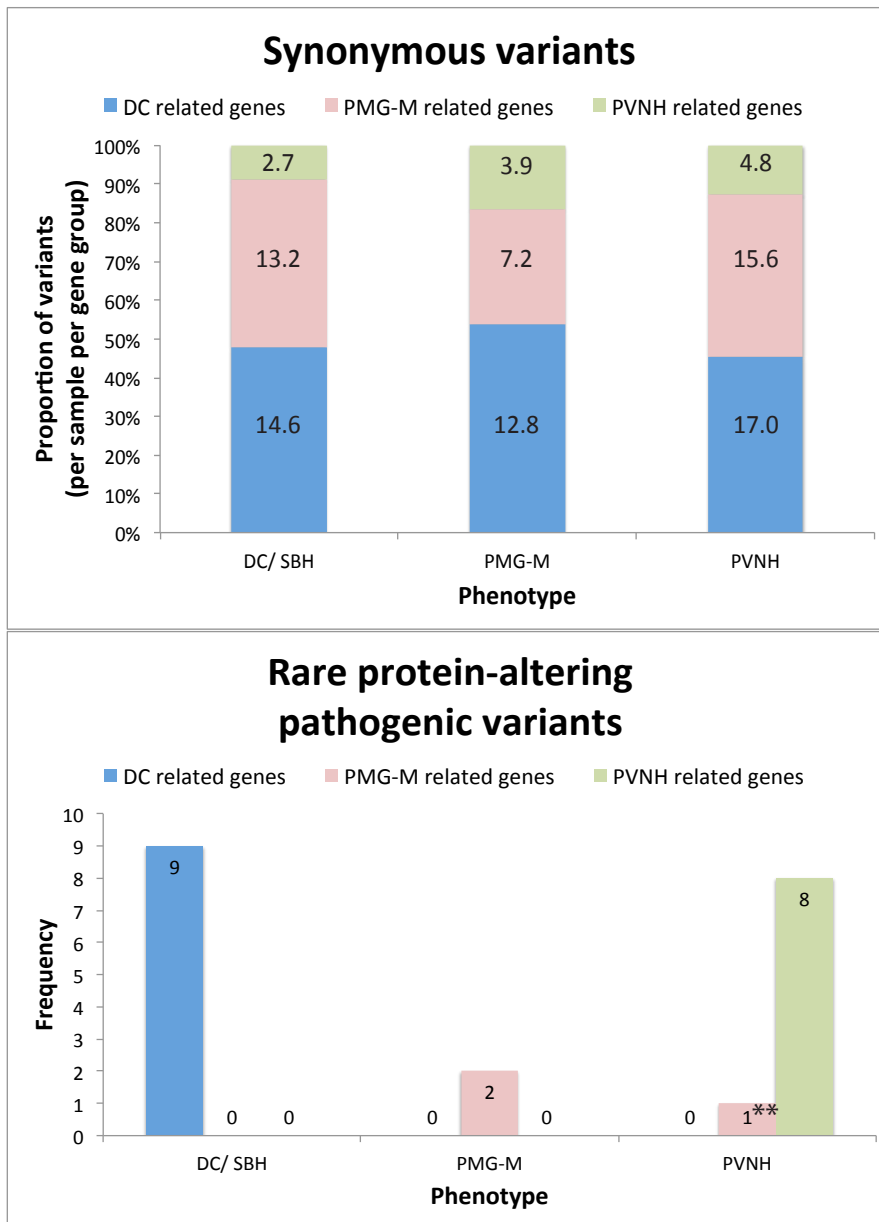

**Figure S6: Spectrum of severity of doublecortex in mosaic individuals.**

Axial MR images of the individuals with mosaicism (A-D) show a spectrum of the severity of doublecortex- (A) small and incomplete posteriorly in DC-4601, to (B) asymmetrical and more severe on the left hemisphere in DC-5103, to (C) complete but thin in DC-2101 to (D) full blown in DC-2801. (E) represents doublecortex as seen in DC-601, an individual with germline *DCX* mutation.

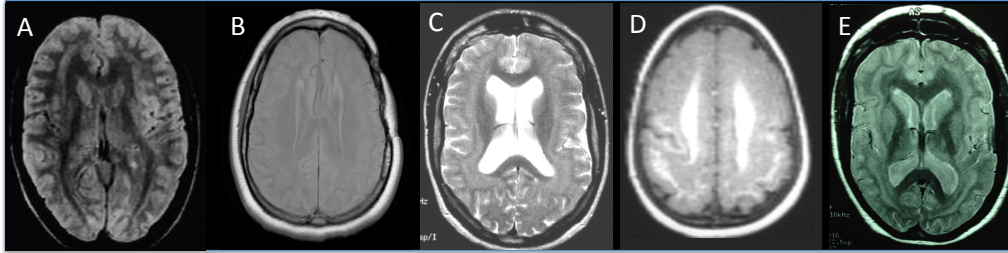



**Figure S7: Axial and midline sagittal MRI brain of individual LIS-6801**  
MRI images show posterior pachygyria, diminished white matter volume and abnormal corpus callosum

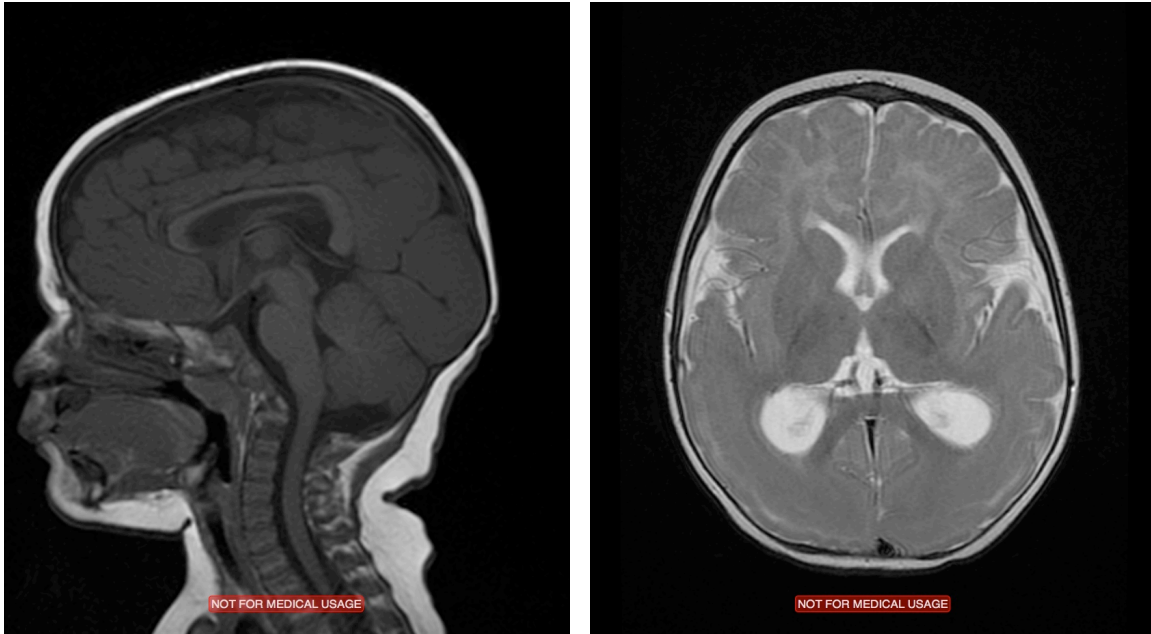

**Figure S8: Sanger chromatogram of family BFP-801**

Sanger chromatogram shows that the proband is heterozygous for the KIF7 variant (c.281C>T;pG94D) and her father is mosaic for the same variant. Mosaicism was confirmed on subcloning (not shown).

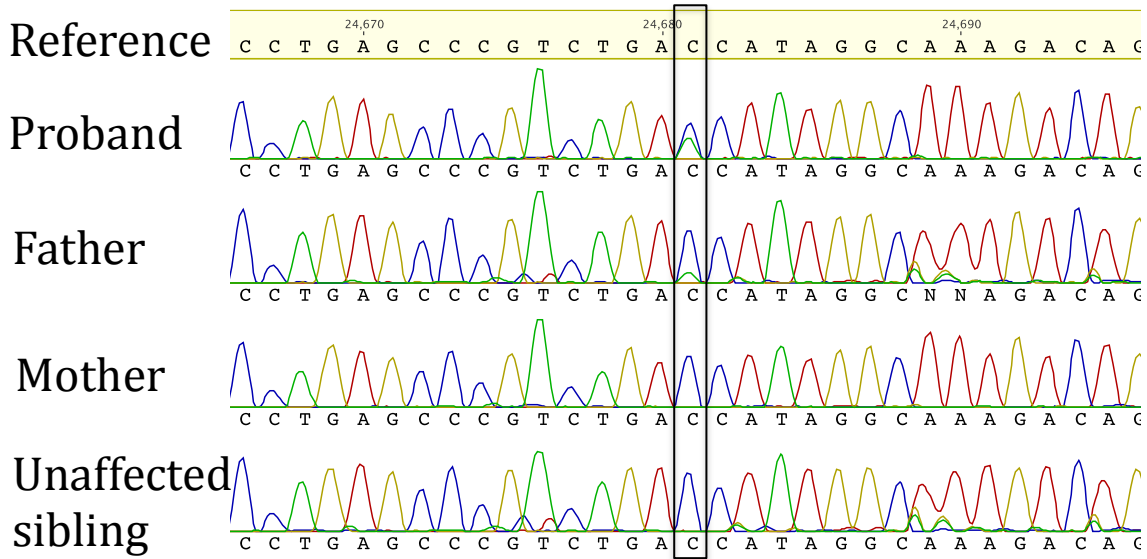

**Figure S9: Axial and midline sagittal MRI brain of individual PAC-1701**  
MRI images show frontal pachygyria, diminished white matter volume and thick corpus callosum

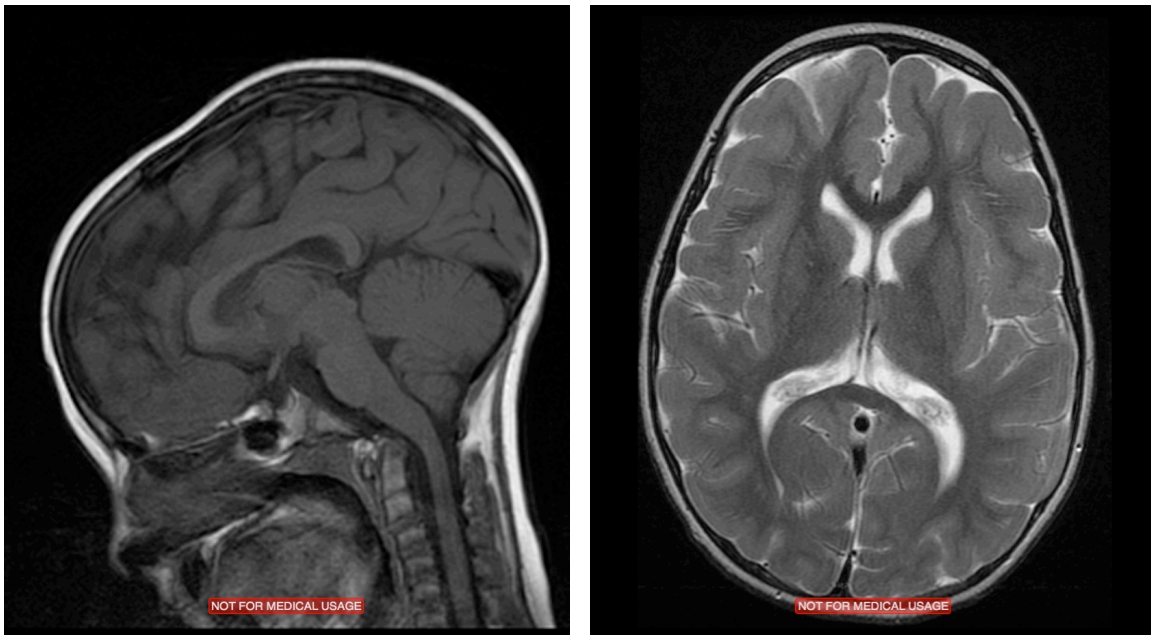

**Figure S10: Axial MRI brain of individual DC-7801**  
MRI images show subcortical band heterotopia

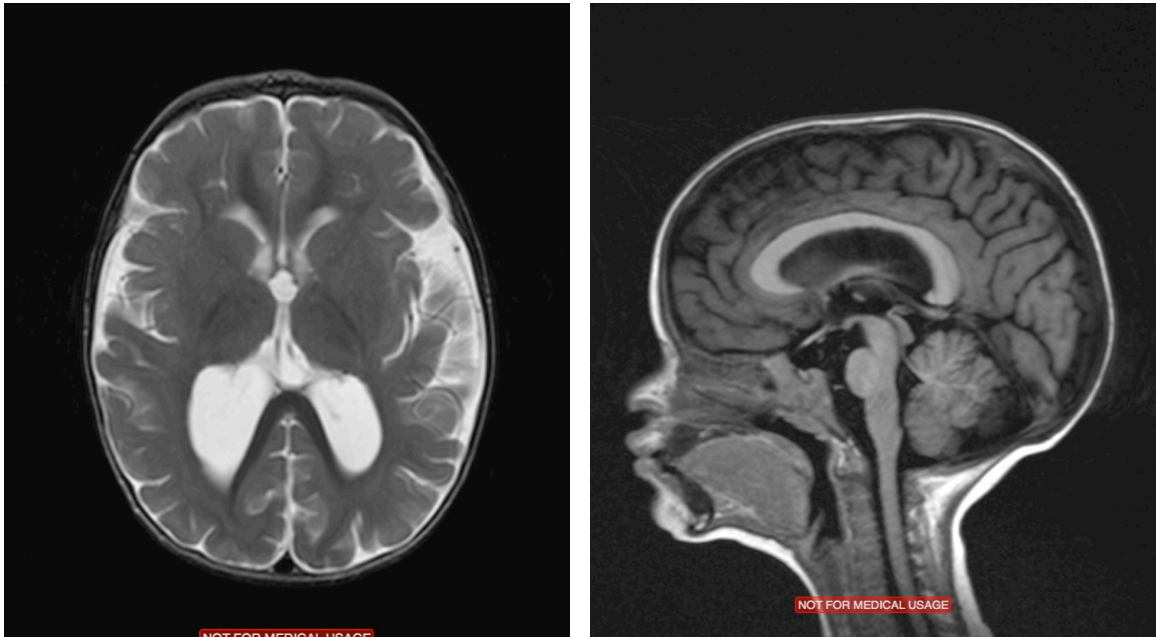

**Table S1: List of known genes in the two panels**

*PANEL 1*

Cumulative target (bp): 84,868

Coverage: 97%

Known genes:

Doublecortex/ pachygyria: *DCX, LIS1, ARX, TUBA1A, TUBB2B, TUBB3*

Periventricular nodular heterotopia: *FLNA*

Polymicrogyria with megalencephaly: *AKT3, PIK3CA, PIK3R2*

*PANEL 2*

Cumulative target (bp): 233,146

Coverage: 86%

Known genes:

Doublecortex/ pachygyria: *DCX, LIS1, ARX, TUBA1A, TUBB2B, TUBB3, ACTB, ACTG1*

Polymicrogyria with megalencephaly: *AKT3, PIK3CA, PIK3R2*

Cortical Malformations, recessive genes: *RELN, VLDLR, WDR62, NDE1*

Others: *DYNC1H1, KIF5C, TUBB4*

**Table S2: Control samples**

| <b>Gene</b>             | <b>Genomic coordinate: nucleotide change</b> | <b>Protein alteration</b> |
|-------------------------|----------------------------------------------|---------------------------|
| <i>AKT3</i> (mosaic)    | chr1:243859016:C>T                           | E17K                      |
| <i>DCX</i> (mosaic)     | chrX:110644295:C>A                           | V210F                     |
| <i>DCX</i> (germline)   | chrX:110644345:T>A                           | K193M                     |
| <i>DCX</i> (germline)*  | chrX:110653512:G>A                           | R39X                      |
| <i>FLNA</i> (germline)* | chrX:153599403:G>C                           | L71V                      |

**\*used to generate mosaic control samples**

**Table S3: Clinical phenotype of mutation positive patients**

| Sample ID | Gender | Ethnicity          | Clinical info                                                                                                                                                                                                                               |
|-----------|--------|--------------------|---------------------------------------------------------------------------------------------------------------------------------------------------------------------------------------------------------------------------------------------|
| DC-4601   | Female | White/Non-Hispanic | Seizures onset 8years, atypical absence and focal seizures. Drug resistant. Normal development prior to onset of seizures                                                                                                                   |
| DC-4401   | Male   | White/Non-Hispanic | Not available                                                                                                                                                                                                                               |
| DC-2101   | Female | White/Non-Hispanic | Intractable seizures. Right hemispherectomy performed in 2001                                                                                                                                                                               |
| DC-5601   | Female | White/Non-Hispanic | Not available                                                                                                                                                                                                                               |
| DC-601    | Female | White/Non-Hispanic | Seizures onset 15 years, learning difficulties, mild ataxia                                                                                                                                                                                 |
| DC-7502   | Female | Other/Unknown      | Seizures at 3.5 yrs old. Delayed motor & speech development; head circumference at age 10y8m=53.5cm (78th%ile), maternal half sister with learning problems                                                                                 |
| LIS-5501  | Female | White/Non-Hispanic | Not available                                                                                                                                                                                                                               |
| LIS-8401  | Female | White/Non-Hispanic | Tongue tie, torticollis, multiple hemangiomas, gross motor delay, hypotonia, strabismus                                                                                                                                                     |
| DC-401    | Female | White/Non-Hispanic | Intractable seizures necessitating temporal lobectomy, language delay and memory impairment                                                                                                                                                 |
| DC-5103   | Female | White/Non-Hispanic | Febrile seizures at 13 months. Status epilepticus at 22 months. Subsequently, she had refractory epilepsy with complex partial seizures, developmental delay, as well as behavioral difficulties with hyperactivity and low attention span. |
| DC-2801   | Female | White/Non-Hispanic | Severe seizures onset 2.5, severe intellectual disability motor delay.                                                                                                                                                                      |
| PAC-101   | Male   | White/Non-Hispanic | Language and speech delays, fine motor skill delays, history of partial complex seizures                                                                                                                                                    |
| PAC-902   | Male   | White/Non-Hispanic | Seizure onset 2 days old- poorly controlled. Severe developmental delay, intellectual disability, and hypotonia. From age 7 years, noted to be dystonic with increased tone and multiple respiratory infections. Deceased at age 8.         |
| PAC-1101  | Female | White/Non-Hispanic | Developmental delay, possible seizures                                                                                                                                                                                                      |
| LIS-6801  | Female | White/Non-Hispanic | Infantile spasms at 6 months old. Developmental delay, increased tone. Prenatal evaluation was normal                                                                                                                                       |
| PH-16001  | Female | White/Non-Hispanic | Chronic lung disease, seizures, pulmonary hypertension, developmental delay, hypotonia, patent foramen ovale, VSD, small ASD, failure to thrive, thrombocytopenia, large platelets                                                          |
| DC-6302   | Female | White/Non-Hispanic | Seizure onset at 15 years old, mostly controlled on Lamictal. Normal cognition and development.                                                                                                                                             |

|           |        |                    |                                                                                                                                                                                                                                                                                     |
|-----------|--------|--------------------|-------------------------------------------------------------------------------------------------------------------------------------------------------------------------------------------------------------------------------------------------------------------------------------|
| PH-1101   | Female | Asian              | Not available                                                                                                                                                                                                                                                                       |
| PH-19202  | Female | White/Non-Hispanic | Events starting at age 10 of hand numbness. Optic disk papilledema. No cardiac findings.                                                                                                                                                                                            |
| PH-3901   | Female | White/Non-Hispanic | Cleft palate, PDA post ligation at 3 months, intractable partial seizures with secondary generalization tonic/clonic seizures. At age 5, developmental delay.                                                                                                                       |
| PH-4801   | Female | White/Non-Hispanic | Epilepsy onset 13yr, noted as well controlled at age 23 but worsening at age 27. Echocardiogram showed congenitally malformed, nonstenotic aortic valve (bicuspid aortic valve), mild aortic insufficiency. Seen for heart palpitations, right atrial enlargement and easy bruising |
| PH-4802   | Female | White/Non-Hispanic | Prenatal hydrocephalus (HC 98%ile), severe developmental delay, abnormal eye movements, diffuse profound hypotonia, difficult seizures initially, controlled by age 2.5yr, chronic constipation, bilateral pes planovalgus, knee recurvatum and hip dysplasia                       |
| PH-8301   | Male   | White/Non-Hispanic | Onset of epilepsy at 17 years                                                                                                                                                                                                                                                       |
| PMG-3801  | Male   | White/Non-Hispanic | Macrocephaly (head circumference +4 SD). No skin findings. Died of pneumonia/ respiratory failure                                                                                                                                                                                   |
| PMG-14201 | Male   | White/Non-Hispanic | Not available                                                                                                                                                                                                                                                                       |
| BFP-601   | Male   | Turkish            | Seizures onset 5 years, mental and motor retardation                                                                                                                                                                                                                                |
| PMG-17401 | Male   | Hispanic           | Dysarthria, cognitive delay, Head circumference 53 cm (~50%ile), normal vision and hearing, no seizures                                                                                                                                                                             |
| PAC-1701  | Female | White/Non-Hispanic | Developmental delay, ADHD, left eye strabismus, external rotation of right leg                                                                                                                                                                                                      |
| DC-7801   | Male   | White/Non-Hispanic | Intractable seizures, infantile spasms, growth hormone deficiency, post axial polydactyly                                                                                                                                                                                           |
| BFP-801   | Female | Turkish            | Developmental delay by 10 months. No history of seizures. Mild right hemiparesis and increased tone.                                                                                                                                                                                |



**Table S4: MRI report of mutation positive patients**

| Sample ID | MRI                                                                                                                                                                                                                                                                                                                                         | Gene          | Phenotype consistent with identified gene |
|-----------|---------------------------------------------------------------------------------------------------------------------------------------------------------------------------------------------------------------------------------------------------------------------------------------------------------------------------------------------|---------------|-------------------------------------------|
| DC-4601   | Relatively mild subcortical band heterotopia with anterior to posterior gradient                                                                                                                                                                                                                                                            | <i>DCX</i>    | Yes but milder                            |
| DC-4401   | Subcortical band heterotopia                                                                                                                                                                                                                                                                                                                | <i>DCX</i>    | Yes                                       |
| DC-2101   | Subcortical band heterotopia. Thin outer cortical layer has slightly shallow sulci. Deeper cortical layer (the “band”) is rather thin, ranging from 3 mm to 10 mm. Bilateral second, deeper (periventricular) foci of heterotopia measuring 2-3 mm x 5 mm are seen bilaterally between anterior aspect of ventricular trigone and the band. | <i>DCX</i>    | Yes but milder                            |
| DC-5601   | Subcortical band heterotopia                                                                                                                                                                                                                                                                                                                | <i>DCX</i>    | Yes                                       |
| DC-601    | Subcortical band heterotopia; atrophic cortex with small gyri/ enlarged sulci. Surrounding subarachnoid spaces are enlarged                                                                                                                                                                                                                 | <i>DCX</i>    | Yes                                       |
| DC-7502   | Subcortical band heterotopia; cortex has normal thickness and normal number of sulci, slightly shallow, band involves most cerebrum with sparing of anterior and inferomedial temporal lobes, medial parietal and occipital lobes. Normal corpus callosum, cerebellum                                                                       | <i>DCX</i>    | Yes                                       |
| LIS-5501  | Classical lissencephaly. Hypogenic corpus callosum, hypoplastic cerebellar hemispheres and vermis.                                                                                                                                                                                                                                          | <i>DCX</i>    | Yes                                       |
| LIS-8401  | Classic lissencephaly with cell sparse zone, most severe in frontal lobes and least severe in parietal and occipital lobes.                                                                                                                                                                                                                 | <i>DCX</i>    | Yes                                       |
| DC-401    | Subcortical band heterotopia                                                                                                                                                                                                                                                                                                                | <i>LIS1</i>   | Yes                                       |
| DC-5103   | Subcortical band heterotopia involving the occipital, temporal and parietal lobes and partially the frontal lobes of both hemispheres                                                                                                                                                                                                       | <i>LIS1</i>   | Yes, consistent with mosaic <i>LIS1</i>   |
| DC-2801   | Diffuse, severe band heterotopia in the posterior region, pachygyria in the anterior portions where the band is not recognizable. Moderate ventriculomegaly.                                                                                                                                                                                | <i>LIS1</i>   | Yes, consistent with mosaic <i>LIS1</i>   |
| PAC-101   | Posterior pachygyria, thick cortex with too few sulci in parietal lobes, extending partly into occipital lobes, absent rostrum, grossly normal white matter volume                                                                                                                                                                          | <i>LIS1</i>   | Yes                                       |
| PAC-902   | Frontal pachygyria, parietal, occipital and temporal polymicrogyria, a small dysplastic cerebellum, hypoplastic pons, and hypoplastic optic nerves                                                                                                                                                                                          | <i>TUBB2B</i> | Yes                                       |
| PAC-1101  | Periventricular nodular heterotopia- parietal pachygyria, globular hippocampi bilaterally, abnormally thick splenium of corpus callosum, diminished white matter                                                                                                                                                                            | <i>TUBA1A</i> | Yes                                       |
| LIS-6801  | Posterior pachygyria with cell sparse zone involving posterior temporal lobes, parietal lobes, occipital lobes, frontal lobes normal, diminished white matter, abnormal corpus callosum (flat body long                                                                                                                                     | <i>KIF5C</i>  | NA                                        |

|           |                                                                                                                                                                                                                                                    |                |     |
|-----------|----------------------------------------------------------------------------------------------------------------------------------------------------------------------------------------------------------------------------------------------------|----------------|-----|
|           | splenium)                                                                                                                                                                                                                                          |                |     |
| PH-16001  | Periventricular nodular heterotopia, heterotopia at variable size lining entirety of lateral ventricles, but not continuous, large right lateral ventricle, slightly reduced white matter volume                                                   | <i>FLNA</i>    | Yes |
| DC-6302   | Bilateral periventricular nodular heterotopia                                                                                                                                                                                                      | <i>FLNA</i>    | Yes |
| PH-1101   | Periventricular nodular heterotopia                                                                                                                                                                                                                | <i>FLNA</i>    | Yes |
| PH-19202  | Extensive subependymal heterotopia with mild supratentorial volume loss for age.                                                                                                                                                                   | <i>FLNA</i>    | Yes |
| PH-3901   | Periventricular heterotopia                                                                                                                                                                                                                        | <i>FLNA</i>    | Yes |
| PH-4801   | Extensive areas of heterotopia along margins of lateral ventricles.                                                                                                                                                                                | <i>FLNA</i>    | Yes |
| PH-4802   | Periventricular nodular heterotopia, small heterotopia lining nearly the entirety of the lateral ventricles, cortex appears normal but incompletely evaluated, fully formed corpus callosum, thinned by hydrocephalus, white matter volume reduced | <i>FLNA</i>    | Yes |
| PH-8301   | Unilateral nodular heterotopia (not contiguous)                                                                                                                                                                                                    | <i>FLNA</i>    | Yes |
| PMG-3801  | Near generalized polymicrogyria and macrocephaly                                                                                                                                                                                                   | <i>AKT3</i>    | Yes |
| PMG-14201 | Bilateral perisylvian polymicrogyria. Delicate polymicrogyria centered in sylvian fissures, involving most of frontal, parietal, and temporal lobes. Excessive folding of calcarine cortex bilaterally.                                            | <i>PIK3CA</i>  | Yes |
| BFP-601   | Pachygyria with anterior-posterior gradient (worse posteriorly). Broad gyri, shallow sulci, thick cortex. Worst in parietal lobes. Least severe in anterior frontal and temporal lobes. Absent rostrum, small splenium                             | <i>DYNC1H1</i> | Yes |
| PMG-17401 | Pachygyria, thick gyri and cortex in posterior frontal parietal and occipital lobes, shallow sulci, no cell-sparse zone seen, small PVNH in left trigone, absent inferior genu, rostrum of corpus callosum                                         | <i>DYNC1H1</i> | Yes |
| PAC-1701  | Mild pachygyria mildly thickened cortex with reduced number of sulci less severe in occipital than frontal lobes, body and splenium of corpus callosum are too thin, mild-mod white matter reduction                                               | <i>KIF1A</i>   | NA  |
| DC-7801   | Posterior subcortical band heterotopia with pachygyria anteriorly. Thick corpus callosum.                                                                                                                                                          | <i>KIF26A</i>  | NA  |
| BFP-801   | Bilateral frontal, temporal, and parietal pachygyria                                                                                                                                                                                               | <i>KIF7</i>    | NA  |

**Table S5: Details of germline mutations (pathogenic and variants of uncertain significance)**

| Phenotype | Patient ID             | Gender | Gene           | Variant                          | Protein    | SIFT        | Polyphen-2        |
|-----------|------------------------|--------|----------------|----------------------------------|------------|-------------|-------------------|
| DC/SBH    | DC-7502                | Female | <i>DCX</i>     | ChrX:110644560:A>G               | Splicing   | -           | -                 |
| DC/SBH    | DC-5601 <sup>1</sup>   | Female | <i>DCX</i>     | ChrX:110644444:delA              | Frameshift | -           | -                 |
| DC/SBH    | DC-601 <sup>1</sup>    | Female | <i>DCX</i>     | ChrX:110644367:C>T               | R186C      | Deleterious | Probably damaging |
| PAC       | LIS-5501               | Female | <i>DCX</i>     | ChrX:110653451:G>A               | R59H       | Deleterious | Probably damaging |
| PAC       | LIS-8401               | Female | <i>DCX</i>     | ChrX:110576302:A>G               | D343G      | Deleterious | Probably damaging |
| PAC       | BFP-601                | Male   | <i>DYNC1H1</i> | Chr14:102452244:A>G              | E561G      | Deleterious | Probably damaging |
| PAC       | PMG-17401              | Male   | <i>DYNC1H1</i> | Chr14:102498756:G>A              | R3344Q     | Deleterious | Probably damaging |
| PAC       | PAC-1101               | Female | <i>TUBA1A</i>  | Chr12:49578924:G>A               | V409I      | Deleterious | Benign            |
| PAC       | PAC-101                | Male   | <i>LISI</i>    | Chr17:2573541:G>A                | G162S      | Tolerated   | Probably damaging |
| PAC       | LIS-6801 <sup>1</sup>  | Female | <i>KIF5C</i>   | Chr2:149806440:G>T               | A268S      | Deleterious | Possibly damaging |
| PMG-M     | PMG-3801               | Male   | <i>AKT3</i>    | Chr1:243668598:C>T               | R465W      | Deleterious | Probably damaging |
| PMG-M     | PMG-14201 <sup>1</sup> | Male   | <i>PIK3CA</i>  | Chr3:178952049:C>T               | A1035V     | Deleterious | Probably damaging |
| PVNH      | DC-6302                | Female | <i>FLNA</i>    | ChrX:152591047:delC              | C796Afs    | -           | -                 |
| PVNH      | PH-1101 <sup>2</sup>   | Female | <i>FLNA</i>    | ChrX:153590679:C>T               | R863X      | -           | -                 |
| PVNH      | PH-19202 <sup>2</sup>  | Female | <i>FLNA</i>    | ChrX:153580926:insT              | E2160X     | -           | -                 |
| PVNH      | PH-3901                | Female | <i>FLNA</i>    | ChrX:153583416_153583419:delTGAA | I1656Rfs   | -           | -                 |

|                                           |                       |        |               |                     |       |             |                   |
|-------------------------------------------|-----------------------|--------|---------------|---------------------|-------|-------------|-------------------|
| PVNH                                      | PH-4801 <sup>2</sup>  | Female | <i>FLNA</i>   | ChrX:153592478:insA | Y731X | -           | -                 |
| PVNH                                      | PH-4802 <sup>2</sup>  | Female | <i>FLNA</i>   | ChrX:153592478:insA | Y731X |             |                   |
| PVNH                                      | PH-8301 <sup>1</sup>  | Male   | <i>FLNA</i>   | ChrX:153592950:C>T  | L656F | Tolerated   | Possibly damaging |
| <i>Variants of uncertain significance</i> |                       |        |               |                     |       |             |                   |
| DC/SBH                                    | DC-7801               | Male   | <i>KIF26A</i> | Chr14:104638949     | Q455R | Tolerated   | Probably damaging |
| PAC                                       | BFP-801 <sup>3</sup>  | Female | <i>KIF7</i>   | Chr15:90195881      | G94D  | Deleterious | Probably damaging |
| PAC                                       | PAC-1701 <sup>1</sup> | Female | <i>KIF1A</i>  | Chr2:241737118      | R18W  | Deleterious | Probably damaging |

<sup>1</sup>Samples for which parental DNA was unavailable

<sup>2</sup>Multiple affected individuals within the family - variant segregated with the phenotype

<sup>3</sup>Inherited from father who is mosaic for the variant

**Table S6: Protein-altering variants predicted to be non-pathogenic by *in silico* prediction algorithms**

| <b>Patient ID</b> | <b>Gene</b>   | <b>Variant</b> | <b>cDNA</b> | <b>Protein</b> | <b>SIFT</b> | <b>Polyphen</b> | <b>Comments</b>          |
|-------------------|---------------|----------------|-------------|----------------|-------------|-----------------|--------------------------|
| PS-6101           | <i>FLNA</i>   | chrX:153588202 | 3877G>A     | V1293I         | Tolerated   | Benign          | Parental DNA unavailable |
| PH-16303          | <i>mTOR</i>   | Chr1:11188128  | 5966A>G     | I1989T         | Tolerated   | Benign          | Parental DNA unavailable |
| PH-18001          | <i>mTOR</i>   | Chr:11184586   | 6631A>G     | N2211D         | Tolerated   | Benign          | Parental DNA unavailable |
| DC-2801           | <i>KIF18A</i> | Chr11:28119200 | 295C>A      | R99S           | Tolerated   | Benign          | Parental DNA unavailable |
| MR-1401           | <i>KIF21B</i> | Chr1:200977938 | 406G>A      | V136M          | Tolerated   | Benign          | Parental DNA unavailable |

**Table S7: Inherited variants- detected in unaffected parent and/or unaffected sibling**

| <b>Patient ID</b> | <b>Gene</b>    | <b>Variant</b> | <b>cDNA</b> | <b>Protein</b> | <b>SIFT</b> | <b>Polyphen</b>      | <b>Comments</b> |
|-------------------|----------------|----------------|-------------|----------------|-------------|----------------------|-----------------|
| DC-7401           | <i>KIF3B</i>   | Chr20:30898442 | 862A>C      | T288P          | Deleterious | Benign               | Inherited       |
| LIS-5701          | <i>KIF3B</i>   | Chr20:30897624 | 44G>A       | R15H           | Deleterious | Probably<br>damaging | Inherited       |
| LIS-6001          | <i>DYNC1I2</i> | Chr2:172600647 | 1625G>A     | C542Y          | Deleterious | Probably<br>damaging | Inherited       |
| PAC-2201          | <i>DYNC1I2</i> | Chr2:172604320 | 1838G>A     | R613Q          | Deleterious | Benign               | Inherited       |
| LIS-8301          | <i>KIF5A</i>   | Chr12:57957244 | 152G>A      | R51H           | Deleterious | Benign               | Inherited       |
| PAC-601           | <i>KIF22</i>   | Chr16:29810622 | 797G>A      | R266Q          | Tolerated   | Possibly<br>damaging | Inherited       |
| PAC-601           | <i>NUDC</i>    | Chr1:27269428  | 613C>T      | R205W          | Deleterious | Benign               | Inherited       |
| PH-23901          | <i>PIK3R2</i>  | Chr19:18272181 | 691C>T      | R231C          | Deleterious | Possibly<br>damaging | Inherited       |

|           |              |                |                  |       |             |                      |                    |
|-----------|--------------|----------------|------------------|-------|-------------|----------------------|--------------------|
| PMG-8401  | <i>PAX6</i>  | Chr11:31812317 | 1124C>A          | P375Q | Deleterious | Possibly<br>damaging | Inherited          |
| PMG-17401 | <i>VLDLR</i> | Chr9:2648672   | 1966C>T<br>(het) | R656C | Deleterious | Probably<br>damaging | Inherited/ carrier |
| DC-2201   | <i>WDR62</i> | Chr19:36587931 | 2470C>T<br>(het) | P824S | Tolerated   | Possibly<br>Damaging | Carrier            |

**Table S8: *p* value for the AARF for each sample**

| <b>Sample ID</b> | <b>Gene</b>   | <b>Coverage</b> | <b>Minor allele count</b> | <b>% minor allele</b> | <b><i>p</i> value*</b> |
|------------------|---------------|-----------------|---------------------------|-----------------------|------------------------|
| <i>Mosaic</i>    |               |                 |                           |                       |                        |
| DC-4601          | <i>DCX</i>    | 1981            | 90                        | 5%                    | 2.2e-226               |
| DC-4401          | <i>DCX</i>    | 2741            | 241                       | 9%                    | 8.3e-246               |
| DC-401           | <i>LIS1</i>   | 3020            | 394                       | 13%                   | 9.6e-210               |
| DC-2101          | <i>DCX</i>    | 555             | 85                        | 15%                   | 1.9e-32                |
| DC-5103          | <i>LIS1</i>   | 1400            | 221                       | 16%                   | 1.0e-82                |
| PAC-902          | <i>TUBB2B</i> | 1290            | 301                       | 23%                   | 7.3e-45                |
| DC-2801          | <i>LIS1</i>   | 1456            | 384                       | 26%                   | 2.5e-39                |
| PH-16001         | <i>FLNA</i>   | 1032            | 362                       | 35%                   | 7.1e-12                |
| <i>Germline</i>  |               |                 |                           |                       |                        |
| PMG-3801         | <i>AKT3</i>   | 514             | 243                       | 47%                   | 0.38                   |
| DC-5601          | <i>DCX</i>    | 971             | 451                       | 46%                   | 0.12                   |
| DC-601           | <i>DCX</i>    | 1803            | 922                       | 51%                   | 0.49                   |



|           |                |      |     |      |         |
|-----------|----------------|------|-----|------|---------|
| DC-7502   | <i>DCX</i>     | 1270 | 622 | 49%  | 0.61    |
| LIS-5501  | <i>DCX</i>     | 1022 | 497 | 49%  | 0.53    |
| LIS-8401  | <i>DCX</i>     | 453  | 213 | 47%  | 0.36    |
| BFP-601   | <i>DYNClHI</i> | 958  | 478 | 50%  | 0.96    |
| PMG-17401 | <i>DYNClHI</i> | 490  | 239 | 49%  | 0.70    |
| DC-6302   | <i>FLNA</i>    | 378  | 194 | 51%  | 0.72    |
| PH-1101   | <i>FLNA</i>    | 407  | 165 | 41%  | 0.007** |
| PH-19202  | <i>FLNA</i>    | 294  | 128 | 44%  | 0.12    |
| PH-3901   | <i>FLNA</i>    | 114  | 49  | 43%  | 0.29    |
| PH-4801   | <i>FLNA</i>    | 316  | 170 | 54%  | 0.34    |
| PH-4802   | <i>FLNA</i>    | 444  | 225 | 51%  | 0.84    |
| PH-8301   | <i>FLNA</i>    | 61   | 61  | 100% | NA      |
| LIS-6801  | <i>KIF5C</i>   | 221  | 141 | 64%  | 0.003** |
| PAC-101   | <i>LIS1</i>    | 639  | 277 | 43%  | 0.017** |
| PMG-14201 | <i>PIK3CA</i>  | 1572 | 749 | 48%  | 0.19    |

|          |               |     |     |     |      |
|----------|---------------|-----|-----|-----|------|
| PAC-1101 | <i>TUBA1A</i> | 383 | 185 | 48% | 0.64 |
|----------|---------------|-----|-----|-----|------|

\*Chi square test

\*\*topocloning confirmed that these variants were germline

**Table S9: Comparison of proportion of reads with mosaic variant detected on NGS and subcloning for validated and not validated variants**

**Variants that validated were detected at a coverage of  $\geq 100x$**

| Sample ID | Gene          | Coverage | % of reads with alternate allele | Number of clones sequenced | % of clones with alternate allele | <i>p</i> value |
|-----------|---------------|----------|----------------------------------|----------------------------|-----------------------------------|----------------|
| DC-4601   | <i>DCX</i>    | 1981     | 5%                               | 84                         | 2%                                | NS             |
| DC-4401   | <i>DCX</i>    | 2741     | 9%                               | 40                         | 10%                               | NS             |
| DC-401    | <i>LISI</i>   | 3020     | 13%                              | 116                        | 10%                               | NS             |
| DC-2101   | <i>DCX</i>    | 555      | 15%                              | 40                         | 15%                               | NS             |
| DC-5103   | <i>LISI</i>   | 1400     | 16%                              | 17                         | 12%                               | NS             |
| PAC-902   | <i>TUBB2B</i> | 1290     | 23%                              | 37                         | 27%                               | NS             |
| DC-2801   | <i>LISI</i>   | 1456     | 26%                              | 37                         | 22%                               | NS             |
| PH-16001  | <i>FLNA</i>   | 1032     | 35%                              | 185                        | 36%                               | NS             |

**Variants that did not validate were detected at a coverage of  $\leq 60x$**

| Sample ID | Gene | Coverage | % of reads with alternate allele | Number of clones | % of clones with alternate allele | <i>p</i> value |
|-----------|------|----------|----------------------------------|------------------|-----------------------------------|----------------|
|-----------|------|----------|----------------------------------|------------------|-----------------------------------|----------------|

|                      |               |    | alternate allele | sequenced <sup>1</sup> | alternate allele |       |
|----------------------|---------------|----|------------------|------------------------|------------------|-------|
| PS-6101 <sup>2</sup> | <i>PIK3R2</i> | 20 | 20%              | 13                     | 0                | 0.12  |
| PS-6101 <sup>2</sup> | <i>TSC1</i>   | 30 | 20%              | 0                      | 0                | -     |
| SE-2401              | <i>TUBB6</i>  | 18 | 22%              | 12                     | 0                | 0.05  |
| PS-6101              | <i>PIK3R2</i> | 23 | 22%              | 24                     | 0                | 0.03  |
| BFP-601              | <i>KIF7</i>   | 17 | 24%              | 40                     | 0                | 0.004 |
| PMG-11301            | <i>TUBB2A</i> | 60 | 25%              | 20                     | 0                | 0.01  |
| PAC-701              | <i>KIF26A</i> | 20 | 25%              | 15                     | 0                | 0.05  |
| LIS-5901             | <i>KIF26A</i> | 10 | 40%              | 13                     | 0                | 0.02  |

<sup>1</sup>Adequate numbers were sequenced for each non-validated variant to obtain a p-value of <0.05 reflecting that the variant was likely a sequencing error

<sup>2</sup>DNA was unavailable for further subcloning experiments

NS= not significant

**Table S10: Details of the mosaic mutations detected by our panel**

| Sample ID | Gene          | Type of mutation (cDNA/protein) | Remarks                                                                                                        |
|-----------|---------------|---------------------------------|----------------------------------------------------------------------------------------------------------------|
| DC-4601   | <i>DCX</i>    | Missense (R186C)                | Moderately conserved nucleotide, highly conserved amino acid, in the doublecortin domain                       |
| DC-4401   | <i>DCX</i>    | Missense (R78L)                 | Highly conserved nucleotide and amino acid, in the doublecortin domain                                         |
| DC-401    | <i>LIS1</i>   | Nonsense (K64X)                 | Premature stop codon. Present at 35% in buccal derived DNA and 23% in saliva derived DNA                       |
| DC-2101   | <i>DCX</i>    | Splicing (1270-1G>A)            | Skip of exon 7, which may lead to an abnormally folded protein or an unstable mRNA                             |
| DC-5103   | <i>LIS1</i>   | Missense (R342P)                | Highly conserved nucleotide and amino acid, in WD40 repeat                                                     |
| PAC-902   | <i>TUBB2B</i> | Missense (R380P)                | Moderately conserved nucleotide, highly conserved amino acid, in the tubulin domain                            |
| DC-2801   | <i>LIS1</i>   | Splicing (1002+1G>A)            | Skip of exon 9                                                                                                 |
| PH-16001  | <i>FLNA</i>   | Frameshift (S1449Pfs*10)        | Creates a frameshift starting at codon Ser 1449, new reading frame ends in a stop codon 9 positions downstream |

**Table S11: Further details of the reported mutations**

| Phenotype | Patient ID | Gene          | Variant             | Germline VS mosaic | Type of mutation | Previously reported  |
|-----------|------------|---------------|---------------------|--------------------|------------------|----------------------|
| DC/SBH    | DC-4601    | <i>DCX</i>    | ChrX:110644367:C>T  | Mosaic (5%)        | Missense         | Yes <sup>16,17</sup> |
| DC/SBH    | DC-4401    | <i>DCX</i>    | ChrX:110653322:G>T  | Mosaic (9%)        | Missense         | Yes <sup>17,18</sup> |
| DC/SBH    | DC-2801    | <i>LIS1</i>   | Chr17:2579901:G>A   | Mosaic (26%)       | Splicing         | Yes <sup>19</sup>    |
| PAC       | PAC-902    | <i>TUBB2B</i> | Chr6:3225184:G>C    | Mosaic (23%)       | Missense         | Yes <sup>20</sup>    |
| DC/SBH    | DC-7502    | <i>DCX</i>    | ChrX:110644560:A>G  | Germline           | Splicing         | Yes <sup>16</sup>    |
| DC/SBH    | DC-601     | <i>DCX</i>    | ChrX:110644367:C>T  | Germline           | Missense         | Yes <sup>16,17</sup> |
| PAC       | LIS-5501   | <i>DCX</i>    | ChrX:110653451:G>A  | Germline           | Missense         | Yes <sup>21,22</sup> |
| PAC       | PMG-17401  | <i>DYNCH1</i> | Chr14:102498756:G>A | Germline           | Missense         | Yes <sup>10</sup>    |
| PAC       | PAC-101    | <i>LIS1</i>   | Chr17:2573541:G>A   | Germline           | Missense         | Yes <sup>19,23</sup> |
| PMG-M     | PMG-3801   | <i>AKT3</i>   | Chr1:243668598:C>T  | Germline           | Missense         | Yes <sup>24</sup>    |
| PMG-M     | PMG-14201  | <i>PIK3CA</i> | Chr3:178952049:C>T  | Germline           | Missense         | Yes <sup>24</sup>    |
| PVNH      | PH-8301    | <i>FLNA</i>   | ChrX:153592950:C>T  | Germline           | Missense         | Yes <sup>25</sup>    |
| DC/SBH    | DC-2101    | <i>DCX</i>    | ChrX:110544972:G>A  | Mosaic (15%)       | Splicing         | No                   |
| DC/SBH    | DC-401     | <i>LIS1</i>   | Chr17:2569382:A>T   | Mosaic (13%)       | Nonsense         | No                   |
| PVNH      | PH-1101    | <i>FLNA</i>   | ChrX:153590679:C>T  | Germline           | Nonsense         | No                   |

|        |          |                |                                      |              |            |    |
|--------|----------|----------------|--------------------------------------|--------------|------------|----|
| DC/SBH | DC-5601  | <i>DCX</i>     | ChrX:110644444:delA                  | Germline     | Frameshift | No |
| PVNH   | PH-16001 | <i>FLNA</i>    | ChrX:153587482:delG                  | Mosaic (35%) | Frameshift | No |
| PVNH   | DC-6302  | <i>FLNA</i>    | ChrX:152591047:delC                  | Germline     | Frameshift | No |
| PVNH   | PH-19202 | <i>FLNA</i>    | ChrX:153580926:insT                  | Germline     | Frameshift | No |
| PVNH   | PH-3901  | <i>FLNA</i>    | ChrX:153583416_<br>153583419:delTGAA | Germline     | Frameshift | No |
| PVNH   | PH-4801  | <i>FLNA</i>    | ChrX:153592478:insA                  | Germline     | Frameshift | No |
| PVNH   | PH-4802  | <i>FLNA</i>    | ChrX:153592478:insA                  | Germline     | Frameshift | No |
| DC/SBH | DC-5103  | <i>LISI</i>    | Chr17:2583480:G>C                    | Mosaic (16%) | Missense   | No |
| PAC    | LIS-8401 | <i>DCX</i>     | ChrX:110576302:A>G                   | Germline     | Missense   | No |
| PAC    | BFP-601  | <i>DYNC1H1</i> | Chr14:102452244:A>G                  | Germline     | Missense   | No |
| PAC    | PAC-1101 | <i>TUBA1A</i>  | Chr12:49578924:G>A                   | Germline     | Missense   | No |
| PAC    | LIS-6801 | <i>KIF5C</i>   | Chr2:149806440:G>T                   | Germline     | Missense   | No |

**Table S12: Summary of MRI findings of individuals with de novo variants in *DYNC1H1***

| Patient ID | Mutation        |         | MRI                                                                     |                                               |            |                             |                                                            |
|------------|-----------------|---------|-------------------------------------------------------------------------|-----------------------------------------------|------------|-----------------------------|------------------------------------------------------------|
|            | gDNA            | Protein | Cortex                                                                  | Corpus Callosum                               | Brainstem  | Cerebellum                  | Others                                                     |
| BFP-601    | 14:102452244A>G | E561G   | Pachygyria with A-P gradient<br>(worse posteriorly)                     | Absent rostrum, small<br>splenium             | Normal     | Normal                      | Mild enlargement of<br>trigones                            |
| PMG-17401  | 14:102498756G>A | R3344Q  | Pachygyria in the posterior<br>frontal, parietal and occipital<br>lobes | Absent rostrum and<br>inferior genu           | Normal     | Normal                      | Small heterotopia in left<br>trigone                       |
| LIS-8201   | 14:102446852G>A | R309H   | Posterior pachygyria with<br>cell sparse zone                           | Small inferior genu, small<br>splenium        | Short pons | Small<br>anterior<br>vermis | Small olfactory bulbs,<br>prominent perivascular<br>spaces |
| PAC-1601   | 14:102452268G>C | R569P   | Posterior pachygyria with<br>cell sparse zone                           | Absent rostrum, mildly<br>enlarged ventricles | Normal     | Normal                      | Decreased white matter<br>volume                           |



## SUPPLEMENTARY REFERENCES

1. Fietz SA, Lachmann R, Brandl H, et al. Transcriptomes of germinal zones of human and mouse fetal neocortex suggest a role of extracellular matrix in progenitor self-renewal. *Proc Natl Acad Sci U S A* 2012;109:11836-41.
2. Li H, Durbin R. Fast and accurate long-read alignment with Burrows-Wheeler transform. *Bioinformatics* 2010;26:589-95.
3. McKenna A, Hanna M, Banks E, et al. The Genome Analysis Toolkit: a MapReduce framework for analyzing next-generation DNA sequencing data. *Genome Res* 2010;20:1297-303.
4. Illumina Technical Note: Somatic Variant Caller (URL: [http://res.illumina.com/documents/products/technotes/technote\\_somatic\\_variant\\_caller.pdf](http://res.illumina.com/documents/products/technotes/technote_somatic_variant_caller.pdf)) [July, 2013].
5. Exome Variant Server, NHLBI Exome Sequencing Project (ESP), Seattle, WA (URL: <http://evs.gs.washington.edu/EVS/>) [September, 2013].
6. Sherry ST, Ward MH, Kholodov M, et al. dbSNP: the NCBI database of genetic variation. *Nucleic Acids Res* 2001;29:308-11.
7. Abecasis GR, Auton A, Brooks LD, et al. An integrated map of genetic variation from 1,092 human genomes. *Nature* 2012;491:56-65.
8. Ng PC, Henikoff S. Predicting deleterious amino acid substitutions. *Genome Res* 2001;11:863-74.
9. Adzhubei IA, Schmidt S, Peshkin L, et al. A method and server for predicting damaging missense mutations. *Nat Methods* 2010;7:248-9.

10. Poirier K, Lebrun N, Broix L, et al. Mutations in TUBG1, DYNC1H1, KIF5C and KIF2A cause malformations of cortical development and microcephaly. *Nat Genet* 2013;45:639-47.
11. Dafinger C, Liebau MC, Elsayed SM, et al. Mutations in KIF7 link Joubert syndrome with Sonic Hedgehog signaling and microtubule dynamics. *J Clin Invest* 2011;121:2662-7.
12. Putoux A, Thomas S, Coene KL, et al. KIF7 mutations cause fetal hydroletharus and acrocallosal syndromes. *Nat Genet* 2011;43:601-6.
13. Liu JS, Schubert CR, Fu X, et al. Molecular basis for specific regulation of neuronal kinesin-3 motors by doublecortin family proteins. *Mol Cell* 2012;47:707-21.
14. Hamdan FF, Gauthier J, Araki Y, et al. Excess of de novo deleterious mutations in genes associated with glutamatergic systems in nonsyndromic intellectual disability. *Am J Hum Genet* 2011;88:306-16.
15. Zhou R, Niwa S, Homma N, Takei Y, Hirokawa N. KIF26A is an unconventional kinesin and regulates GDNF-Ret signaling in enteric neuronal development. *Cell* 2009;139:802-13.
16. des Portes V, Francis F, Pinard JM, et al. doublecortin is the major gene causing X-linked subcortical laminar heterotopia (SCLH). *Hum Mol Genet* 1998;7:1063-70.
17. Bahi-Buisson N, Souville I, Fourniol FJ, et al. New insights into genotype-phenotype correlations for the doublecortin-related lissencephaly spectrum. *Brain* 2013;136:223-44.

18. Pilz DT, Matsumoto N, Minnerath S, et al. LIS1 and XLIS (DCX) mutations cause most classical lissencephaly, but different patterns of malformation. *Hum Mol Genet* 1998;7:2029-37.
19. Cardoso C, Leventer RJ, Matsumoto N, et al. The location and type of mutation predict malformation severity in isolated lissencephaly caused by abnormalities within the LIS1 gene. *Hum Mol Genet* 2000;9:3019-28.
20. Cushion TD, Dobyns WB, Mullins JG, et al. Overlapping cortical malformations and mutations in TUBB2B and TUBA1A. *Brain* 2013;136:536-48.
21. Gleeson JG, Minnerath SR, Fox JW, et al. Characterization of mutations in the gene doublecortin in patients with double cortex syndrome. *Ann Neurol* 1999;45:146-53.
22. Matsumoto N, Leventer RJ, Kuc JA, et al. Mutation analysis of the DCX gene and genotype/phenotype correlation in subcortical band heterotopia. *Eur J Hum Genet* 2001;9:5-12.
23. Caspi M, Coquelle FM, Koifman C, et al. LIS1 missense mutations: variable phenotypes result from unpredictable alterations in biochemical and cellular properties. *J Biol Chem* 2003;278:38740-8.
24. Riviere JB, Mirzaa GM, O'Roak BJ, et al. De novo germline and postzygotic mutations in AKT3, PIK3R2 and PIK3CA cause a spectrum of related megalencephaly syndromes. *Nat Genet* 2012;44:934-40.
25. Sheen VL, Dixon PH, Fox JW, et al. Mutations in the X-linked filamin 1 gene cause periventricular nodular heterotopia in males as well as in females. *Hum Mol Genet* 2001;10:1775-83.
